# Supplementary material for: Scaling biodiversity-stability relationships from populations to meta-communities across trophic levels
Source: Nat Commun. 2026 Jul 7;17:6038. doi: 10.1038/s41467-026-75366-1 (PMC13350715; doi:10.1038/s41467-026-75366-1)
Supplement: Supplementary file 4 — Source Data [file 41467_2026_75366_MOESM4_ESM.xlsx]

## Sheet: Fig. 2
Path values for the SEM in Fig. 2
Path way	Estimate	SE	z	P	Stand. Est.
Plant meta-community stability ~
Plant community stability	0.84	0.01	117.36	0	0.85
Plant community asynchrony	0.47	0.01	71.03	0	0.47
Herbivore community stability	0.02	0.01	2.56	0.01	0.02
Herbivore community asynchrony	0.02	0.01	2.36	0.018	0.02
Plant community stability ~
Plant species stability	0.89	0	294.47	0	0.88
Plant species asynchrony	0.31	0	75.29	0	0.31
Herbivore species stability	0.01	0	3.15	0.002	0.01
Plant species stability ~
Plant species diversity	-0.14	0.03	-5.2	0	-0.14
Herbivore species diversity	0.35	0.03	12.15	0	0.36
Plant community asynchrony ~
Plant beta diversity	0.19	0.03	6.24	0	0.19
Herbivore beta diversity	-0.06	0.03	-1.91	0.056	-0.06
Plant species asynchrony ~
Plant species diversity	0.64	0.02	29.28	0	0.64
Herbivore species diversity	0.29	0.02	14.01	0	0.29
Herbivore meta-community stability ~			~
Herbivore community stability	0.75	0	273.1	0	0.75
Herbivore community asynchrony	0.8	0	299.62	0	0.78
Plant community stability	-0.02	0	-5.62	0	-0.02
Plant community asynchrony	0.01	0	5.01	0	0.01
Herbivore community stability ~			~
Herbivore species stability	0.39	0	330.03	0	0.38
Herbivore species asynchrony	0.89	0	727.08	0	0.88
Herbivore community asynchrony ~
Herbivore species diversity	-0.13	0.03	-4.98	0	-0.13
Herbivore beta diversity	0.48	0.03	17.96	0	0.49
Herbivore species asynchrony ~
Herbivore species diversity	0.62	0.03	24.89	0	0.62
Plant species diversity	-0.08	0.02	-3.17	0.002	-0.08
Herbivore species diversity ~
Plant species diversity	0.06	0.03	1.81	0.07	0.06
R-Square
	Estimate
Plant meta-community stability	0.95
Plant community stability	0.99
Plant species stability	0.14
Plant community asynchrony	0.04
Plant species asynchrony	0.51
Herbivore meta-community stability	0.99
Herbivore community stability	0.99
Herbivore community asynchrony	0.25
Herbivore species asynchrony	0.38
Herbivore species diversity	0

## Sheet: Fig. 3a-c
Summary of the interactive effects of plant and herbivore species diversity on stability across levels of organization from SEMs (Fig. 3a-c)
plant species diversity	herbivore species diversity	stability metrics	mean	sd	median	quantile25	quantile75
1	4	Community stability	-0.816811	0.0573607	-0.814246	-0.84983	-0.779828
1	4	Meta-community stability	-0.70767	0.0899408	-0.702855	-0.763728	-0.638878
1	4	Species stability	-0.464794	0.0626614	-0.461696	-0.498563	-0.425082
1	8	Community stability	-0.455648	0.0421111	-0.457065	-0.485483	-0.428861
1	8	Meta-community stability	-0.391741	0.0872527	-0.384443	-0.449412	-0.317307
1	8	Species stability	-0.142917	0.0437175	-0.142197	-0.173519	-0.116552
1	16	Community stability	0.278863	0.0363092	0.273954	0.252591	0.306034
1	16	Meta-community stability	0.236817	0.0815916	0.237864	0.178153	0.293545
1	16	Species stability	0.506345	0.0398202	0.506328	0.477056	0.527083
1	32	Community stability	1.73661	0.118036	1.73954	1.65808	1.80174
1	32	Meta-community stability	1.49446	0.121477	1.47566	1.41241	1.57764
1	32	Species stability	1.78735	0.121276	1.78665	1.70632	1.86626
2	4	Community stability	-0.498454	0.0896387	-0.501187	-0.558381	-0.437329
2	4	Meta-community stability	-0.442824	0.0983781	-0.445599	-0.514453	-0.375354
2	4	Species stability	-1.05838	0.0941874	-1.05601	-1.11607	-0.991399
2	8	Community stability	-0.130094	0.0707577	-0.129413	-0.184774	-0.0773445
2	8	Meta-community stability	-0.124927	0.0989668	-0.12475	-0.185721	-0.0732972
2	8	Species stability	-0.729119	0.0789686	-0.728536	-0.789203	-0.672331
2	16	Community stability	0.592481	0.0808871	0.594042	0.545972	0.638677
2	16	Meta-community stability	0.498505	0.110274	0.499293	0.435565	0.574129
2	16	Species stability	-0.0920357	0.0880339	-0.0984598	-0.143317	-0.045457
2	32	Community stability	2.06459	0.140084	2.06329	1.97853	2.1481
2	32	Meta-community stability	1.76986	0.15037	1.78464	1.65208	1.87463
2	32	Species stability	1.21088	0.154962	1.21857	1.12069	1.31294
4	4	Community stability	0.0818763	0.27259	0.0678218	-0.102337	0.274925
4	4	Meta-community stability	0.0351762	0.226417	0.0237731	-0.111623	0.178718
4	4	Species stability	-2.29873	0.280629	-2.3208	-2.48278	-2.14642
4	8	Community stability	0.473522	0.297133	0.461495	0.244401	0.681513
4	8	Meta-community stability	0.374736	0.267632	0.390794	0.186478	0.550093
4	8	Species stability	-1.96459	0.326928	-1.96509	-2.18625	-1.75826
4	16	Community stability	1.22469	0.283599	1.21978	1.02594	1.44722
4	16	Meta-community stability	1.02607	0.235887	1.03304	0.870221	1.16687
4	16	Species stability	-1.2835	0.307251	-1.29682	-1.46128	-1.09229
4	32	Community stability	2.73703	0.314516	2.71979	2.55595	2.95324
4	32	Meta-community stability	2.32837	0.280271	2.28774	2.17716	2.5142
4	32	Species stability	0.0539668	0.359797	0.0161207	-0.189076	0.297843

## Sheet: Fig. 3d-f
Summary of the interactive effects of plant and herbivore species diversity on stability across levels of organization from SEMs (Fig. 3d-f)
plant species diversity	herbivore species diversity	stability metrics	mean	sd	median	quantile25	quantile75
1	4	Community stability	-0.922016	0.0499047	-0.923941	-0.956205	-0.890139
1	4	Meta-community stability	-0.521245	0.390004	-0.540923	-0.765773	-0.263995
1	4	Species stability	0	0	0	0	0
1	8	Community stability	-0.417563	0.0322539	-0.418106	-0.438462	-0.397038
1	8	Meta-community stability	-0.237352	0.391887	-0.220006	-0.50193	0.0324839
1	8	Species stability	0	0	0	0	0
1	16	Community stability	0.590254	0.0336399	0.591203	0.562733	0.612203
1	16	Meta-community stability	0.320605	0.382032	0.332889	0.0725379	0.572825
1	16	Species stability	0	0	0	0	0
1	32	Community stability	2.59069	0.103249	2.58849	2.53482	2.65966
1	32	Meta-community stability	1.4174	0.412792	1.45334	1.12306	1.7142
1	32	Species stability	0	0	0	0	0
2	4	Community stability	-1.19006	0.0774484	-1.18555	-1.23329	-1.13451
2	4	Meta-community stability	-0.725886	0.388137	-0.697292	-0.98045	-0.478122
2	4	Species stability	0	0	0	0	0
2	8	Community stability	-0.713011	0.0711242	-0.709176	-0.758121	-0.674718
2	8	Meta-community stability	-0.462493	0.388928	-0.451984	-0.751063	-0.140074
2	8	Species stability	0	0	0	0	0
2	16	Community stability	0.300952	0.0590855	0.301576	0.253692	0.34286
2	16	Meta-community stability	0.093824	0.382833	0.151249	-0.166704	0.384899
2	16	Species stability	0	0	0	0	0
2	32	Community stability	2.29235	0.130965	2.28898	2.20089	2.39594
2	32	Meta-community stability	1.19388	0.424838	1.23192	0.905142	1.50032
2	32	Species stability	0	0	0	0	0
4	4	Community stability	-1.77966	0.212076	-1.79378	-1.95749	-1.61896
4	4	Meta-community stability	-1.16699	0.433574	-1.12622	-1.43252	-0.885878
4	4	Species stability	0	0	0	0	0
4	8	Community stability	-1.27207	0.26713	-1.24215	-1.43545	-1.08546
4	8	Meta-community stability	-0.88872	0.43285	-0.931841	-1.20256	-0.597345
4	8	Species stability	0	0	0	0	0
4	16	Community stability	-0.305038	0.236125	-0.279925	-0.449778	-0.128788
4	16	Meta-community stability	-0.36727	0.45514	-0.434027	-0.672603	0.0131661
4	16	Species stability	0	0	0	0	0
4	32	Community stability	1.69982	0.283054	1.67587	1.52599	1.8785
4	32	Meta-community stability	0.743426	0.429466	0.752613	0.442173	0.987952
4	32	Species stability	0	0	0	0	0
